# Supplementary material for: Interaction energies between two antiandrogenic and one androgenic agonist receptor in the presence of a T877A mutation in prostate cancer: a quantum chemistry analysis
Source: Royal Society of Chemistry journal article supplement (doi:10.1039/c9nj06276a), 2020-01-01
Supplement: c9nj06276a1.pdf [file c9nj06276a1.pdf]

## Electronic Supplementary Information

### Interaction energies between two antiandrogenic and one androgenic agonist receptor in the presence of a T877A mutation in prostate cancer: a quantum chemistry analysis

K. S. Bezerra<sup>a</sup>, J. F. Vianna<sup>a</sup>, J. X. Lima Neto<sup>a</sup>, J. I. N. Oliveira<sup>a</sup>, Eudenilson L. Albuquerque<sup>a</sup>, and Umberto L. Fulco<sup>a\*</sup>  
*Departamento de Biofísica e Farmacologia, Universidade Federal do Rio Grande do Norte, 59072-970, Natal-RN, Brazil*

---

\* Corresponding author, e-mail: [umbertofulco@gmail.com](mailto:umbertofulco@gmail.com); Tel: +55-84-32153793; Fax: +55-84-32153791

TABLE S1. CPA interaction in complex with the AR receptor, regions and groups where there is drug-residue interaction, radius and energetic value (in kcal/mol).

| Complex AR-CPA |                      |         |                          |                          |                          |
|----------------|----------------------|---------|--------------------------|--------------------------|--------------------------|
| Residue        | Atomic Group         | $r$ (Å) | Energy ( $\epsilon=10$ ) | Energy ( $\epsilon=20$ ) | Energy ( $\epsilon=40$ ) |
| LEU704         | II(C12)H             | 2       | -7.4                     | -6.3                     | -6.3                     |
| ASN705         | II(C12)H             | 2       | -0.4                     | -0.4                     | -0.4                     |
| LEU707         | I(C2)H               | 2       | -2.1                     | -2.0                     | -1.9                     |
| MET780         | III(C15)H            | 2       | -0.7                     | -0.6                     | -0.6                     |
| ALA877         | III(C21)H            | 2       | 0.9                      | 0.8                      | 0.8                      |
| GLY708         | I(C1)H               | 2.5     | -2.1                     | -2.1                     | -2.0                     |
| GLN711         | II(C12)H             | 2.5     | 1.3                      | 1.1                      | 1.1                      |
| TRP741         | II(C9)H              | 2.5     | -3.7                     | -3.6                     | -3.6                     |
| MET742         | III(C15)H            | 2.5     | -3.7                     | -3.7                     | -3.7                     |
| MET745         | II(C19)H             | 2.5     | -3.8                     | -3.7                     | -3.6                     |
| PHE764         | I(C22)H              | 2.5     | -5.0                     | -4.9                     | -4.8                     |
| LEU873         | II(C22)H; III(C15)H  | 2.5     | -4.0                     | -4.0                     | -3.9                     |
| LEU880         | III(C21)H            | 2.5     | -2.4                     | -2.3                     | -2.3                     |
| PHE891         | III(C21)H            | 2.5     | -1.2                     | -1.2                     | -1.2                     |
| MET895         | II(C18)H             | 2.5     | -2.6                     | -2.4                     | -2.4                     |
| PHE697         | III(C24)H            | 3       | -0.9                     | -0.9                     | -0.9                     |
| LEU701         | III(C20)O            | 3       | -1.3                     | -1.3                     | -1.2                     |
| MET749         | I(C4)H               | 3       | -2.7                     | -2.6                     | -2.6                     |
| ARG752         | I(C3)O3              | 3       | -2.1                     | -1.4                     | -1.1                     |
| SER778         | III(C24)H            | 3       | -1.5                     | -1.5                     | -1.4                     |
| PHE876         | III(C24)H            | 3       | -3.2                     | -2.6                     | -2.6                     |
| VAL746         | II(C6)CL             | 3.5     | -1.4                     | -1.3                     | -1.3                     |
| ILE899         | II(C18)H             | 3.5     | -1.0                     | -1.0                     | -0.9                     |
| LEU768         | I(C22)H              | 4       | -0.4                     | -0.4                     | -0.4                     |
| MET787         | II(C6)CL             | 4       | -1.1                     | -1.0                     | -1.0                     |
| ARG779         | III(C24)H            | 4.5     | -0.4                     | -0.4                     | -0.4                     |
| SER703         | I(C22)H              | 5       | -0.1                     | -0.1                     | -0.1                     |
| PHE770         | III(C24)H            | 5       | -0.3                     | -0.3                     | -0.2                     |
| PHE878         | III(C21)H            | 5       | -0.3                     | -0.2                     | -0.2                     |
| LEU881         | III(C21)H; III(C21)H | 5       | -0.2                     | -0.2                     | -0.2                     |
| ALA687         | I(C22)H              | 5.5     | -0.1                     | -0.1                     | -0.1                     |
| LEU700         | III(C24)H            | 5.5     | -0.4                     | -0.4                     | -0.3                     |
| GLU709         | I(C1)H               | 5.5     | -1.7                     | -0.5                     | -0.4                     |
| HIS874         | III(C15)H            | 5.5     | -0.6                     | -0.5                     | -0.5                     |
| GLU706         | I(C22)H; I(C1)H      | 6       | -0.3                     | -0.2                     | -0.2                     |
| ALA748         | I(C3)O               | 6       | -0.2                     | -0.2                     | -0.1                     |
| ALA765         | I(C22)H; I(C3)O      | 6       | 0.7                      | 0.7                      | 0.5                      |
| GLN783         | III(C15)H            | 6       | -0.2                     | -0.2                     | -0.2                     |
| ARG710         | I(C1)H; I(C2)H       | 6.5     | -0.2                     | -0.2                     | -0.2                     |
| LEU712         | I(C1)H; I(C2)H       | 6.5     | -0.1                     | -0.1                     | -0.1                     |
| PHE747         | II(C6)CL             | 6.5     | -0.1                     | -0.1                     | -0.1                     |
| GLY750         | I(C4)H               | 6.5     | 0.0                      | 0.0                      | 0.0                      |
| LEU762         | II(C6)CL             | 6.5     | -0.2                     | -0.2                     | -0.2                     |
| TYR763         | I(C3)O               | 6.5     | -0.1                     | -0.1                     | -0.1                     |
| LYS777         | III(C24)H            | 6.5     | 0.1                      | 0.0                      | 0.0                      |
| CYS784         | III(C24)H            | 6.5     | -0.2                     | -0.2                     | 0.0                      |
| ILE869         | II(C6)CL; II(C22)H   | 6.5     | -0.2                     | -0.2                     | -0.1                     |
| ALA870         | II(C22)H             | 6.5     | -0.2                     | -0.2                     | -0.1                     |
| GLU872         | III(C16)H; III(C15)H | 6.5     | -0.2                     | -0.2                     | -0.1                     |
| GLN875         | III(C16)H            | 6.5     | -0.2                     | -0.2                     | -0.2                     |
| ASP879         | III(C21)H            | 6.5     | -0.3                     | -0.2                     | -0.2                     |
| SER884         | III(C21)H; III(C21)H | 6.5     | -0.1                     | 0.0                      | 0.0                      |
| PRO892         | II(C18)H; II(C12)H   | 6.5     | -0.1                     | -0.1                     | 0.0                      |

|        |                      |      |      |      |      |
|--------|----------------------|------|------|------|------|
| VAL685 | I(C2)H               | 7    | -0.1 | 0.0  | 0.0  |
| SER702 | III(C20)O; III(C24)H | 7    | -0.1 | -0.1 | -0.1 |
| VAL715 | II(C19)H             | 7    | -0.1 | -0.1 | -0.1 |
| GLY743 | II(C6)CL; II(C19)H   | 7    | -0.1 | -0.1 | -0.1 |
| LEU744 | I(C4)H; II(C19)H     | 7    | -0.1 | -0.1 | -0.1 |
| MET775 | III(C24)H            | 7    | -0.4 | -0.1 | -0.1 |
| LYS883 | III(C21)H            | 7    | -0.8 | -0.1 | 0.0  |
| VAL903 | III(C21)H; II(C18)H  | 7    | 0.0  | 0.0  | 0.0  |
| ARG774 | III(C24)H; III(C24)H | 7.5  | -0.3 | -0.1 | -0.1 |
| TYR781 | III(C24)H; III(C24)H | 7.5  | -0.2 | -0.1 | -0.1 |
| ILE882 | III(C21)H; III(C21)H | 7.5  | 0.0  | 0.0  | 0.0  |
| ALA896 | III(C21)H            | 7.5  | -0.1 | -0.1 | -0.1 |
| CYS686 | II(C12)H             | 8    | 0.0  | 0.0  | 0.0  |
| SER696 | III(C24)H            | 8    | 0.0  | 0.0  | 0.0  |
| ALA698 | III(C24)H            | 8    | 0.0  | 0.0  | 0.0  |
| ALA699 | III(C24)H            | 8    | 0.0  | 0.0  | 0.0  |
| HIS776 | III(C24)H            | 8    | 0.0  | 0.0  | 0.0  |
| LEU790 | II(C6)CL             | 8    | 0.0  | 0.0  | 0.0  |
| ASP890 | III(C20)O            | 8    | 0.0  | 0.0  | 0.0  |
| ILE898 | II(C18)H; II(C18)H   | 8    | -0.1 | -0.1 | 0.0  |
| HIS689 | I(C22)H              | 8.5  | 0.0  | 0.0  | 0.0  |
| HIS714 | I(C2)H               | 8.5  | 0.0  | 0.0  | 0.0  |
| SER740 | II(C19)H             | 8.5  | 0.0  | 0.0  | 0.0  |
| SER753 | I(C4)H               | 8.5  | 0.0  | 0.0  | 0.0  |
| VAL866 | II(C6)CL             | 8.5  | -0.1 | 0.0  | 0.0  |
| ARG871 | III(C15)H; III(C15)H | 8.5  | 0.1  | 0.0  | 0.0  |
| TRP751 | I(C3)O; I(C4)H       | 9    | -0.1 | -0.1 | 0.0  |
| PRO766 | I(C2)H; I(C3)O       | 9    | 0.0  | 0.0  | 0.0  |
| ASP767 | I(C22)H              | 9    | 0.1  | 0.0  | 0.0  |
| VAL769 | I(C22)H              | 9    | 0.0  | 0.0  | 0.0  |
| LEU907 | III(C16)H; III(C21)H | 9    | 0.0  | 0.0  | 0.0  |
| GLY688 | I(C22)H              | 9.5  | 0.0  | 0.0  | 0.0  |
| VAL713 | II(C19)H; II(C19)H   | 9.5  | 0.0  | 0.0  | 0.0  |
| SER782 | III(C24)H            | 9.5  | 0.0  | 0.0  | 0.0  |
| ARG786 | II(C6)CL             | 9.5  | 0.0  | 0.0  | 0.0  |
| ARG788 | II(C6)CL             | 9.5  | 0.0  | 0.0  | 0.0  |
| HIS885 | III(C21)H            | 9.5  | 0.0  | 0.0  | 0.0  |
| MET894 | I(C1)H; II(C11)H     | 9.5  | 0.0  | 0.0  | 0.0  |
| SER900 | III(C21)H            | 9.5  | 0.0  | 0.0  | 0.0  |
| VAL684 | I(C3)O               | 10   | -0.1 | 0.0  | 0.0  |
| GLN738 | II(C19)H; II(C19)H   | 10   | 0.0  | 0.0  | 0.0  |
| SER791 | I(C4)H; II(C6)CL     | 10   | 0.0  | 0.0  | 0.0  |
| LYS808 | I(C3)O; I(C4)H       | 10   | -0.2 | -0.1 | -0.1 |
| SER888 | III(C21)H            | 10   | 0.0  | 0.0  | 0.0  |
| VAL889 | III(C21)H            | 10   | 0.0  | 0.0  | 0.0  |
| PRO682 | I(C3)O               | 10.5 | 0.0  | 0.0  | 0.0  |
| ILE737 | II(C19)H             | 10.5 | 0.0  | 0.0  | 0.0  |
| TYR739 | II(C19)H             | 10.5 | -0.1 | -0.1 | -0.1 |
| ASN756 | I(C3)O               | 10.5 | -0.1 | 0.0  | 0.0  |
| TYR773 | III(C24)H            | 10.5 | 0.0  | 0.0  | 0.0  |
| VAL785 | II(C6)CL; III(C24)H  | 10.5 | 0.0  | 0.0  | 0.0  |
| PHE794 | II(C6)CL; I(C4)H     | 10.5 | 0.0  | 0.0  | 0.0  |
| PHE804 | I(C3)O               | 10.5 | 0.0  | 0.0  | 0.0  |
| LEU811 | I(C4)H               | 10.5 | 0.0  | 0.0  | 0.0  |
| PRO868 | II(C22)H; III(C15)H  | 10.5 | 0.0  | 0.0  | 0.0  |

|        |                      |      |      |      |     |
|--------|----------------------|------|------|------|-----|
| GLU897 | III(C21)H            | 10.5 | -0.1 | -0.1 | 0.0 |
| PRO904 | III(C21)H            | 10.5 | 0.0  | 0.0  | 0.0 |
| GLY683 | I(C2)H; I(C3)O       | 11   | 0.1  | 0.0  | 0.0 |
| ASP695 | III(C24)H; III(C24)H | 11   | 0.0  | 0.0  | 0.0 |
| VAL716 | II(C19)H             | 11   | 0.0  | 0.0  | 0.0 |
| MET761 | I(C4)H               | 11   | 0.0  | 0.0  | 0.0 |
| GLN867 | II(C22)H             | 11   | -0.1 | -0.1 | 0.0 |
| GLU893 | II(C11)H; II(C18)H   | 11   | -0.1 | -0.1 | 0.0 |

---

TABLE S2. HFT interaction in complex with the AR receptor, regions and groups where there is drug-residue interaction, radius and energetic value (in kcal/mol).

| Complex AR-HFT |                      |         |                          |                          |                          |
|----------------|----------------------|---------|--------------------------|--------------------------|--------------------------|
| Residue        | Atomic Group         | $r$ (Å) | Energy ( $\epsilon=10$ ) | Energy ( $\epsilon=20$ ) | Energy ( $\epsilon=40$ ) |
| LEU704         | III(O11)H; (N11)H    | 2.5     | -6.7                     | -6.0                     | -5.2                     |
| ASN705         | III(C11)O            | 2.5     | 2.8                      | 3.0                      | 3.2                      |
| LEU707         | I(C5)H               | 2.5     | -1.7                     | -1.6                     | -1.6                     |
| GLN711         | I(C5)H               | 2.5     | -0.5                     | -0.5                     | -0.5                     |
| MET745         | I(C4)N; I(N1)O       | 2.5     | -0.8                     | -0.8                     | -0.8                     |
| PHE764         | II(C7)F; I(C4)N      | 2.5     | -4.0                     | -2.7                     | -2.7                     |
| MET895         | III(C12)H            | 2.5     | 0.8                      | 0.9                      | 0.9                      |
| LEU701         | III(C13)H; III(C13)H | 3       | -1.9                     | -1.8                     | -1.7                     |
| GLY708         | III(N8)H             | 3       | -1.9                     | -1.8                     | -1.8                     |
| MET742         | III(C12)H            | 3       | -1.7                     | -1.7                     | -1.6                     |
| MET749         | II(C7)F; I(N1)O      | 3       | -3.7                     | -3.6                     | -3.6                     |
| ARG752         | I(N1)O               | 3       | -3.9                     | -3.3                     | -3.0                     |
| MET787         | II(C7)F              | 3       | -1.7                     | -1.7                     | -1.7                     |
| PHE876         | III(C13)H            | 3       | -1.0                     | -1.0                     | -0.9                     |
| ALA877         | III(C12)H; III(C12)H | 3       | -1.5                     | -1.5                     | -1.4                     |
| ILE899         | III(C12)H; III(C12)H | 3       | -0.7                     | -0.7                     | -0.7                     |
| VAL746         | II(C7)F              | 3.5     | -1.4                     | -1.4                     | -1.4                     |
| MET780         | III(C3)H; III(C10)O  | 3.5     | -1.4                     | -1.3                     | -1.3                     |
| LEU873         | II(C7)F              | 3.5     | -1.6                     | -1.6                     | -1.6                     |
| LEU880         | III(C13)H            | 3.5     | -0.5                     | -0.5                     | -0.5                     |
| PHE891         | III(C12)H            | 3.5     | -1.1                     | -0.9                     | -0.9                     |
| SER703         | I(C5)H; I(N1)O       | 5       | 0.0                      | 0.0                      | 0.0                      |
| GLU706         | I(C2)H; I(C5)H       | 5       | -1.9                     | -0.3                     | -0.2                     |
| GLU709         | I(N1)O; I(C5)H       | 5       | -0.4                     | -0.3                     | -0.2                     |
| TRP741         | III(C12)H; I(N1)O    | 5       | -0.5                     | -0.5                     | -0.5                     |
| CYS784         | I(C2)H               | 5       | -0.1                     | -0.1                     | -0.1                     |
| SER702         | I(N1)O               | 5.5     | -0.2                     | -0.2                     | -0.1                     |
| ALA748         | I(N1)O1; I(C5)H      | 5.5     | -0.3                     | -0.2                     | -0.2                     |
| LEU762         | I(C5)H               | 5.5     | -0.2                     | -0.2                     | -0.2                     |
| TYR763         | I(N1)O1; I(C2)H      | 5.5     | -0.2                     | -0.1                     | -0.1                     |
| VAL889         | I(C5)H               | 5.5     | -0.1                     | -0.1                     | -0.1                     |
| PRO892         | I(C2)H; I(C5)H       | 5.5     | -0.1                     | -0.1                     | -0.1                     |
| LEU700         | I(N1)O               | 6       | -0.1                     | -0.1                     | -0.1                     |
| LEU744         | I(C2)H; I(C5)H       | 6       | -0.4                     | -0.4                     | -0.4                     |
| GLY750         | I(N1)O; II(C7)F      | 6       | -0.1                     | 0.0                      | 0.0                      |
| ALA765         | I(C2)H               | 6       | -0.1                     | -0.1                     | 0.0                      |
| LEU768         | I(C2)H; I(N1)O       | 6       | -0.2                     | -0.2                     | -0.2                     |
| LEU881         | I(C2)H               | 6       | -0.1                     | -0.1                     | -0.1                     |
| ARG710         | I(C2)H               | 6.5     | 0.2                      | 0.0                      | 0.0                      |
| PHE747         | I(C2)H; I(C5)H       | 6.5     | -0.1                     | -0.1                     | -0.1                     |
| GLN783         | I(N1)O; I(C2)H       | 6.5     | -0.1                     | -0.1                     | -0.1                     |
| HIS874         | I(C2)H; I(C5)H       | 6.5     | -0.1                     | -0.1                     | -0.1                     |
| PHE878         | III(C12)H            | 6.5     | -0.1                     | -0.1                     | -0.1                     |
| ASP890         | I(C2)H               | 6.5     | -0.4                     | -0.2                     | -0.1                     |
| VAL685         | I(N1)O; I(C5)H       | 7       | -0.1                     | 0.0                      | 0.0                      |
| ALA687         | I(C5)H; I(C6)H       | 7       | -0.1                     | -0.1                     | -0.1                     |
| LEU712         | I(C5)H               | 7       | -0.1                     | -0.1                     | 0.0                      |
| VAL715         | I(C5)H; II(C7)F      | 7       | 0.0                      | 0.0                      | 0.0                      |
| GLY743         | II(C7)F              | 7       | 0.0                      | 0.0                      | 0.0                      |
| SER753         | II(C7)F; I(N1)O      | 7       | -0.1                     | 0.0                      | 0.0                      |
| PHE770         | III(C13)H            | 7       | -0.2                     | -0.2                     | -0.2                     |
| SER778         | III(C13)H            | 7       | -0.1                     | -0.1                     | -0.1                     |
| ILE869         | II(C7)F              | 7       | -0.1                     | -0.1                     | -0.1                     |

|        |                      |      |      |      |      |
|--------|----------------------|------|------|------|------|
| ALA870 | II(C7)F              | 7    | 0.0  | 0.0  | 0.0  |
| ALA896 | III(C12)H            | 7    | 0.0  | 0.0  | 0.0  |
| VAL903 | III(C12)H            | 7    | 0.0  | 0.0  | 0.0  |
| PHE697 | III(C13)H            | 7.5  | -0.1 | -0.1 | -0.1 |
| LEU790 | II(C7)F              | 8    | -0.1 | 0.0  | 0.0  |
| GLN875 | I(C6)H; III(C13)H    | 8    | -0.1 | -0.1 | 0.0  |
| ASP879 | III(C12)H; III(C13)H | 8    | -0.1 | -0.1 | 0.0  |
| SER884 | III(C13)H; III(C12)H | 8    | 0.0  | 0.0  | 0.0  |
| ILE898 | III(C12)H            | 8    | 0.0  | 0.0  | 0.0  |
| CYS686 | I(C5)H               | 8.5  | 0.0  | 0.0  | 0.0  |
| ALA698 | III(C13)H            | 8.5  | -0.1 | 0.0  | 0.0  |
| ALA699 | III(O11)H            | 8.5  | -0.1 | 0.0  | 0.0  |
| PRO766 | I(N1)O               | 8.5  | 0.0  | 0.0  | 0.0  |
| VAL866 | II(C7)F              | 8.5  | 0.0  | 0.0  | 0.0  |
| GLU872 | III(C10)O; III(C13)H | 8.5  | 0.0  | 0.0  | 0.0  |
| VAL887 | III(C13)H            | 8.5  | 0.0  | 0.0  | 0.0  |
| MET894 | III(C12)H            | 8.5  | 0.0  | 0.0  | 0.0  |
| HIS714 | I(C5)H; I(N1)O       | 9    | 0.0  | 0.0  | 0.0  |
| TRP751 | II(C7)F; I(N1)O      | 9    | -0.1 | -0.1 | 0.0  |
| VAL769 | I(N1)O               | 9    | 0.0  | 0.0  | 0.0  |
| MET775 | II(C7)F              | 9    | -2.0 | 0.0  | 0.0  |
| ARG779 | III(C13)C            | 9    | 0.1  | 0.0  | 0.0  |
| ILE882 | III(C13)H; III(C12)H | 9    | 0.0  | 0.0  | 0.0  |
| SER900 | III(C12)H            | 9    | 0.0  | 0.0  | 0.0  |
| HIS689 | I(C6)H               | 9.5  | 0.0  | 0.0  | 0.0  |
| VAL713 | I(C5)H               | 9.5  | 0.0  | 0.0  | 0.0  |
| SER740 | II(C7)F              | 9.5  | 0.0  | 0.0  | 0.0  |
| ASP767 | I(C5)H               | 9.5  | -0.1 | -0.1 | 0.0  |
| ARG786 | II(C7)F              | 9.5  | -0.2 | -0.1 | -0.1 |
| ARG788 | II(C7)F              | 9.5  | -0.1 | -0.1 | 0.0  |
| SER791 | II(C7)F              | 9.5  | 0.0  | 0.0  | 0.0  |
| LYS808 | I(N1)O               | 9.5  | -0.2 | -0.1 | -0.1 |
| LYS883 | III(C13)H            | 9.5  | 0.1  | -0.4 | 0.0  |
| GLU897 | III(C12)H            | 9.5  | -0.1 | -0.1 | 0.0  |
| PRO682 | I(N1)O               | 10   | 0.3  | 0.0  | 0.0  |
| VAL785 | II(C7)F              | 10   | 0.3  | 0.0  | 0.0  |
| PHE804 | I(N1)O               | 10   | 0.3  | 0.0  | 0.0  |
| ARG871 | III(C10)O; III(C12)H | 10   | 0.5  | -0.1 | 0.0  |
| GLU893 | III(C12)H            | 10   | -0.2 | -0.1 | 0.0  |
| GLY683 | I(N1)O               | 10.5 | 0.0  | 0.0  | 0.0  |
| VAL684 | I(N1)O               | 10.5 | 0.0  | 0.0  | 0.0  |
| GLY688 | I(C6)H; I(C5)H       | 10.5 | 0.0  | 0.0  | 0.0  |
| GLN738 | III(C12)H            | 10.5 | 0.0  | 0.0  | 0.0  |
| MET761 | II(C7)F              | 10.5 | 0.0  | 0.0  | 0.0  |
| ARG774 | III(C13)H            | 10.5 | 0.0  | 0.0  | 0.0  |
| TYR781 | III(C13)H            | 10.5 | 0.0  | 0.0  | 0.0  |
| SER782 | II(C7)F              | 10.5 | 0.0  | 0.0  | 0.0  |
| LEU811 | II(C7)F              | 10.5 | 0.0  | 0.0  | 0.0  |
| LEU907 | III(C12)H; III(C13)H | 10.5 | 0.0  | 0.0  | 0.0  |
| PHE754 | II(C7)F; I(N1)O      | 11   | 0.0  | 0.0  | 0.0  |
| LYS777 | III(C13)H            | 11   | 0.1  | 0.0  | 0.0  |
| PHE794 | II(C7)F; I(N1)O      | 11   | 0.0  | 0.0  | 0.0  |
| GLN867 | II(C7)F              | 11   | 0.0  | 0.0  | 0.0  |
| SER888 | III(C13)H            | 11   | 0.0  | 0.0  | 0.0  |
| GLN902 | III(C12)H            | 11   | 0.0  | 0.0  | 0.0  |

|        |           |    |     |     |     |
|--------|-----------|----|-----|-----|-----|
| PRO904 | III(C12)H | 11 | 0.0 | 0.0 | 0.0 |
| ILE906 | III(C12)H | 11 | 0.0 | 0.0 | 0.0 |

---

TABLE S3. RLL interaction in complex with the AR receptor, regions and groups where there is drug-residue interaction, radius and energetic value (in kcal/mol).

| Complex AR-RLL |                    |         |                          |                          |                          |
|----------------|--------------------|---------|--------------------------|--------------------------|--------------------------|
| Residue        | Atomic Group       | $r$ (Å) | Energy ( $\epsilon=10$ ) | Energy ( $\epsilon=20$ ) | Energy ( $\epsilon=40$ ) |
| LEU701         | II(C12)H           | 2.5     | -1.9                     | -1.8                     | -1.7                     |
| LEU704         | III(C1)H           | 2.5     | -0.9                     | -0.8                     | -0.7                     |
| ASN705         | II(OH)H            | 2.5     | -11.2                    | -5.2                     | -5.1                     |
| LEU707         | III(C2)H           | 2.5     | -2.1                     | -2.1                     | -2.1                     |
| GLN711         | III(C2)H           | 2.5     | 0.1                      | 0.0                      | -0.1                     |
| TRP741         | II(CAQ)H; I(CAK)H  | 2.5     | -4.6                     | -4.4                     | -4.3                     |
| MET742         | I(CAK)H            | 2.5     | -4.4                     | -4.2                     | -4.1                     |
| MET745         | I(CAK)H            | 2.5     | -3.2                     | -3.2                     | -3.0                     |
| ARG752         | III(C8)N           | 2.5     | -1.9                     | -1.9                     | -1.7                     |
| PHE764         | IV(C7)F            | 2.5     | -3.1                     | -3.1                     | -3.1                     |
| ILE899         | I(C21)H            | 2.5     | -2.0                     | -2.0                     | -2.0                     |
| GLY708         | I(CAR)H; III(C1)H  | 3       | -2.5                     | -2.4                     | -2.3                     |
| MET749         | IV(C7)F            | 3       | -2.8                     | -2.8                     | -2.6                     |
| MET780         | II(C12)H           | 3       | -2.3                     | -2.2                     | -2.2                     |
| PHE876         | II(C12)H           | 3       | -1.3                     | -1.3                     | -1.3                     |
| ALA877         | I(C21)H            | 3       | -1.9                     | -1.9                     | -1.9                     |
| MET895         | I(C16)O            | 3       | -4.9                     | -4.7                     | -4.6                     |
| VAL746         | IV(C7)F            | 3.5     | -2.0                     | -1.9                     | -0.9                     |
| MET787         | IV(C7)F            | 3.5     | -1.6                     | -1.6                     | -0.3                     |
| LEU873         | IV(C7)F            | 3.5     | -2.3                     | -2.3                     | -2.2                     |
| LEU880         | II(C12)H           | 3.5     | -0.6                     | -0.6                     | -0.5                     |
| ILE898         | I(C22)N            | 3.5     | -3.1                     | -0.7                     | 0.0                      |
| HIS874         | I(C20)H            | 4       | -1.2                     | -1.2                     | -1.3                     |
| PHE891         | II(C3)H; I(C21)H   | 4       | -0.8                     | -0.2                     | -0.7                     |
| VAL903         | I(C22)N            | 4       | -0.9                     | -0.9                     | -0.9                     |
| GLN738         | I(C22)N            | 4.5     | -0.4                     | -0.3                     | -0.1                     |
| SER703         | III(C1)H           | 5       | -0.6                     | -0.6                     | -0.6                     |
| VAL715         | I(CAK)H            | 5       | -0.1                     | -0.1                     | -0.1                     |
| TYR763         | III(C8)N           | 5       | -0.2                     | -0.3                     | -0.2                     |
| LEU768         | III(C1)H           | 5       | -0.3                     | -0.3                     | -0.3                     |
| GLU706         | II(OH)H            | 5.5     | -0.7                     | -0.4                     | -0.2                     |
| GLU709         | III(C1)H           | 5.5     | -0.7                     | -0.4                     | -0.4                     |
| GLY743         | II(CAQ)H; I(CAK)H  | 5.5     | -0.2                     | -0.2                     | -0.2                     |
| LEU744         | I(CAK)H            | 5.5     | -0.2                     | -0.2                     | -0.2                     |
| ALA748         | III(C8)N           | 5.5     | -0.4                     | -0.3                     | -0.3                     |
| LEU762         | IV(C7)F            | 5.5     | -0.3                     | -0.3                     | -0.2                     |
| ALA765         | III(C2)H           | 5.5     | 0.1                      | 0.1                      | 0.1                      |
| VAL889         | II(C12)H           | 5.5     | 0.3                      | 0.1                      | 0.0                      |
| GLN902         | I(C22)N            | 5.5     | -0.2                     | -0.2                     | -0.1                     |
| ALA687         | III(C1)H; III(C2)H | 6       | -0.1                     | -0.1                     | -0.1                     |
| LEU700         | II(OH)H            | 6       | -0.1                     | -0.1                     | -0.1                     |
| SER702         | II(OH)H            | 6       | -0.2                     | 0.1                      | -0.1                     |
| LEU712         | I(CAK)H            | 6       | -0.3                     | -0.3                     | -0.3                     |
| TYR739         | I(C22)N            | 6       | -0.1                     | -0.1                     | 0.0                      |
| SER740         | II(CAQ)H; I(CAK)H  | 6       | -0.1                     | 0.0                      | 0.0                      |
| PHE747         | IV(C7)F            | 6       | -0.1                     | -0.1                     | -0.1                     |
| GLY750         | IV(C7)F            | 6       | 0.0                      | 0.0                      | 0.0                      |
| SER778         | II(C12)H           | 6       | -0.1                     | -0.1                     | -0.1                     |
| CYS784         | IV(C7)F            | 6       | -0.1                     | -0.1                     | -0.1                     |
| PHE878         | I(C21)H; I(C20)H   | 6       | -0.2                     | -0.1                     | -0.1                     |
| PRO892         | II(OH)H            | 6       | -0.2                     | -0.2                     | -0.1                     |
| ILE906         | I(C22)N            | 6       | -0.1                     | -0.1                     | -0.1                     |
| ILE737         | I(C22)N; II(CAQ)H  | 6.5     | 0.0                      | 0.0                      | -0.1                     |



|        |                    |     |      |      |      |
|--------|--------------------|-----|------|------|------|
| PHE770 | II(C12)H           | 6.5 | -0.2 | -0.2 | -0.2 |
| ALA870 | IV(C7)F            | 6.5 | -0.1 | -0.1 | -0.1 |
| LEU881 | I(C21)H            | 6.5 | 0.2  | -0.1 | -0.1 |
| VAL685 | III(C2)H           | 7   | -0.1 | -0.1 | -0.1 |
| PHE697 | II(C12)H           | 7   | -0.1 | -0.1 | -0.1 |
| ARG710 | III(C1)H; III(C2)H | 7   | 0.3  | 0.1  | 0.0  |
| SER753 | IV(C7)F            | 7   | -0.1 | -0.1 | 0.0  |
| GLN783 | IV(C7)F            | 7   | -0.1 | -0.1 | -0.1 |
| ILE869 | IV(C7)F            | 7   | -0.1 | -0.1 | -0.1 |
| ASP890 | II(OH)H            | 7   | -0.5 | -0.2 | -0.1 |
| ALA896 | I(C21)H; I(C20)H   | 7   | 0.0  | 0.0  | 0.0  |
| MET894 | I(C20)H            | 7.5 | -0.8 | -0.1 | -0.1 |
| SER900 | I(C20)H            | 7.5 | 0.0  | 0.0  | 0.0  |
| CYS686 | III(C2)H           | 8   | 0.0  | 0.0  | 0.0  |
| PRO766 | III(C2)H; III(C8)N | 8   | 0.0  | 0.0  | 0.0  |
| LEU790 | IV(C7)F            | 8   | 0.0  | 0.0  | 0.0  |
| ILE815 | I(C22)N            | 8   | 0.0  | 0.0  | 0.0  |
| GLU872 | II(C12)H           | 8   | -0.1 | -0.1 | -0.1 |
| GLN875 | I(C20)H; II(C3)H   | 8   | -0.1 | -0.1 | -0.1 |
| PRO904 | I(C22)N; I(C20)H   | 8   | 0.0  | 0.0  | 0.0  |
| HIS689 | III(C1)H           | 8.5 | 0.0  | 0.0  | 0.0  |
| ALA699 | II(OH)H            | 8.5 | -0.3 | -0.1 | 0.0  |
| TRP751 | IV(C7)F; III(C8)N  | 8.5 | -0.1 | -0.1 | -0.1 |
| ARG779 | II(C12)H           | 8.5 | 0.1  | 0.0  | 0.0  |
| VAL866 | IV(C7)F            | 8.5 | 0.0  | 0.0  | 0.0  |
| VAL887 | II(C12)H           | 8.5 | 0.0  | 0.0  | 0.0  |
| GLU897 | I(C22)N            | 8.5 | -0.1 | -0.1 | 0.0  |
| VAL901 | I(C22)N; I(C20)H   | 8.5 | -0.1 | -0.1 | 0.0  |
| LEU907 | I(C22)N; I(C20)H   | 8.5 | 0.0  | 0.0  | 0.0  |
| ALA698 | II(OH)H            | 9   | -0.1 | 0.0  | 0.0  |
| VAL713 | I(CAK)H            | 9   | 0.0  | 0.0  | 0.0  |
| ALA735 | I(C22)N            | 9   | 0.1  | 0.0  | 0.0  |
| VAL736 | I(C22)N            | 9   | 0.0  | 0.0  | 0.0  |
| ASP767 | III(C2)H           | 9   | -0.3 | -0.2 | -0.1 |
| VAL769 | III(C8)N           | 9   | -0.1 | 0.0  | 0.0  |
| ARG788 | IV(C7)F            | 9   | 0.0  | 0.0  | 0.0  |
| SER791 | IV(C7)F            | 9   | 0.0  | 0.0  | 0.0  |
| ARG871 | I(C22)N            | 9   | -0.1 | -0.1 | -0.1 |
| ASP879 | II(C13)H           | 9   | -0.1 | -0.1 | 0.0  |
| SER884 | II(C3)H; II(C12)H  | 9   | 0.0  | 0.0  | 0.0  |
| VAL684 | III(C8)N           | 9.5 | 0.0  | 0.0  | 0.0  |
| GLY688 | III(C1)H; III(C2)H | 9.5 | 0.0  | 0.0  | 0.0  |
| HIS714 | III(C2)H           | 9.5 | 0.0  | 0.0  | 0.0  |
| VAL716 | I(CAK)H; II(CAQ)H  | 9.5 | 0.0  | 0.0  | 0.0  |
| ASN756 | III(C8)N           | 9.5 | 0.0  | 0.0  | 0.0  |
| ARG774 | II(C12)H           | 9.5 | 0.1  | 0.0  | 0.0  |
| MET775 | II(C12)H; IV(C7)F  | 9.5 | 0.0  | 0.0  | 0.0  |
| ARG786 | IV(C7)F            | 9.5 | -0.2 | -0.1 | -0.1 |
| LEU811 | I(CAK)H            | 9.5 | 0.0  | 0.0  | 0.0  |
| LYS883 | II(C12)H           | 9.5 | 0.2  | 0.1  | 0.0  |
| TRP718 | I(CAK)H            | 10  | 0.0  | 0.0  | 0.0  |
| MET734 | I(C22)N            | 10  | 0.0  | 0.0  | 0.0  |
| MET761 | IV(C7)F            | 10  | 0.0  | 0.0  | 0.0  |
| LYS777 | II(C12)H           | 10  | 0.1  | 0.1  | 0.0  |
| TYR781 | II(C12)H           | 10  | 0.0  | 0.0  | 0.0  |

|        |                   |      |      |      |      |
|--------|-------------------|------|------|------|------|
| VAL785 | IV(C7)F           | 10   | 0.0  | 0.0  | 0.0  |
| PHE804 | III(C8)N          | 10   | 0.0  | 0.0  | 0.0  |
| LYS808 | III(C8)N; IV(C7)F | 10   | -0.1 | -0.1 | 0.0  |
| LEU812 | I(CAK)H           | 10   | 0.0  | 0.0  | 0.0  |
| ILE882 | I(C20)H; II(C3)H  | 10   | 0.0  | 0.0  | 0.0  |
| GLU893 | I(C21)H           | 10   | -0.1 | -0.1 | 0.0  |
| LYS905 | I(C22)N           | 10   | -0.3 | -0.2 | -0.1 |
| VAL911 | I(C22)N           | 10   | 0.0  | 0.0  | 0.0  |
| PRO682 | III(C8)N          | 10.5 | 0.0  | 0.0  | 0.0  |
| GLY683 | III(C8)N          | 10.5 | 0.0  | 0.0  | 0.0  |
| SER696 | II(C12)H          | 10.5 | 0.0  | 0.0  | 0.0  |
| PHE754 | III(C8)N          | 10.5 | 0.0  | 0.0  | 0.0  |
| PHE794 | IV(C7)F           | 10.5 | 0.0  | 0.0  | 0.0  |
| GLN867 | II(CAQ)H; IV(C7)F | 10.5 | 0.0  | 0.0  | 0.0  |
| ALA719 | I(CAK)H           | 11   | 0.0  | 0.0  | 0.0  |
| SER782 | II(C12)H          | 11   | 0.0  | 0.0  | 0.0  |
| HIS789 | IV(C7)F           | 11   | 0.0  | 0.0  | 0.0  |
| PRO868 | IV(C7)F           | 11   | 0.0  | 0.0  | 0.0  |
| SER888 | II(OH)F; II(C12)H | 11   | 0.0  | 0.0  | 0.0  |

---
